# Supplementary material
Source: Springer Nature journal article supplement (https://www.springermedizin.de/resource/supplementary/13058_2013_3595_MOESM7_ESM.pdf/9703902)

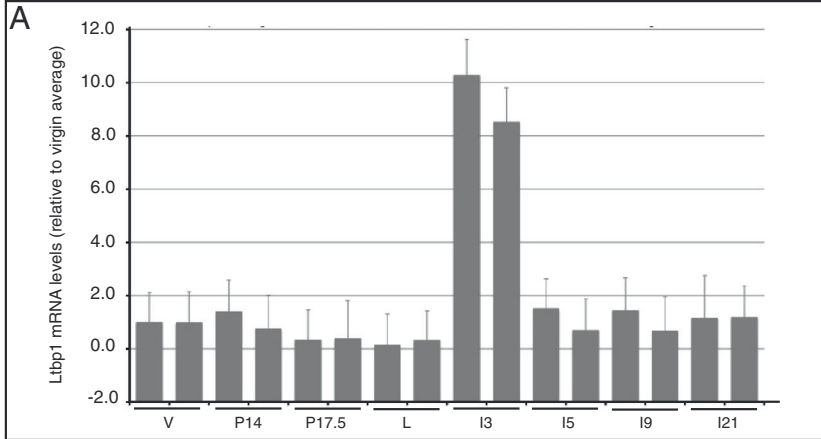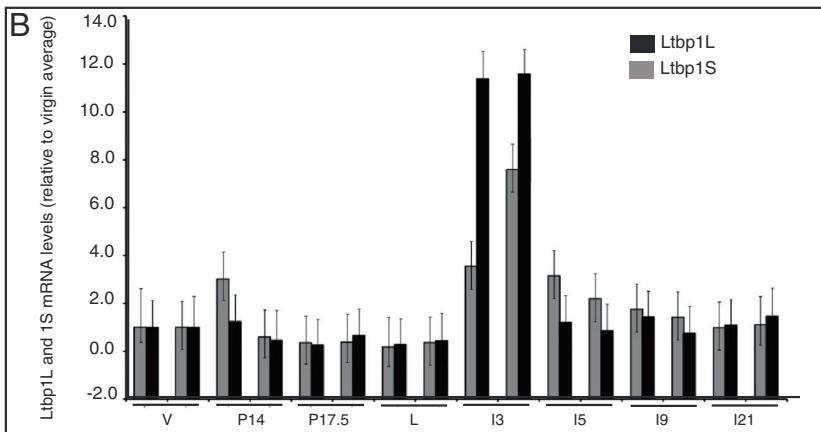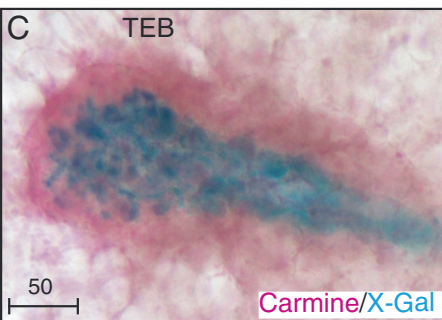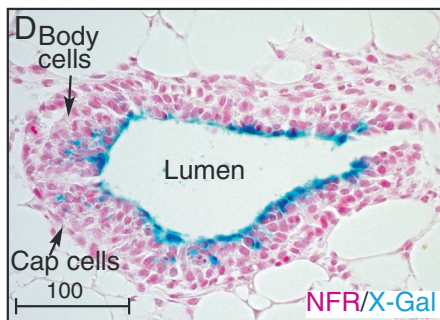

Supplement: MOESM7 [file 9703902]
